# Supplementary material for: Identification of the Volatile Compounds and Observation of the Glandular Trichomes in Opisthopappus taihangensis and Four Species of Chrysanthemum
Source: PubMed Central journal article supplement (PMC7412243; doi:10.3390/plants9070855), 2020-07-06
Supplement: plants-09-00855-s001.pdf [file plants-09-00855-s001.pdf]

## SUPPLEMENTARY INFO

# Identification of Volatile Compounds and Observation of Glandular Trichomes in *Opisthopappus taihangensis* and Four Species of *Chrysanthemum*

Yanhong Guo<sup>1</sup>, Tengxun Zhang<sup>1</sup>, Jian Zhong<sup>1</sup>, Tingting Ba<sup>1</sup>, Ting Xu<sup>1</sup>, Qixiang Zhang<sup>1,2</sup> and Ming Sun<sup>1\*</sup>

<sup>1</sup> Beijing Key Laboratory of Ornamental Plants Germplasm Innovation & Molecular Breeding; National Engineering Research Center for Floriculture; Beijing Laboratory of Urban and Rural Ecological Environment; Key Laboratory of Genetics and Breeding in Forest Trees and Ornamental Plants of Ministry of Education; School of Landscape Architecture, Beijing Forestry University, Beijing, China

<sup>2</sup> Beijing Advanced Innovation Center for Tree Breeding by Molecular Design, Beijing Forestry University, Beijing, 100083, China.

**Table 1.** Main volatile compounds of five wild species.

| Compounds              | CAS        | Relative content (%) |                |                |                |                |
|------------------------|------------|----------------------|----------------|----------------|----------------|----------------|
|                        |            | OT                   | CV             | CL             | CN             | CI             |
| Leaf alcohol           | 928-96-1   | 1.01±0.0<br>3        | 15.40±1.<br>25 | 13.77±1.<br>17 | 12.66±0.<br>93 | 11.35±0.<br>94 |
| (+)-Cuparene           | 16982-00-6 | 0.26±0.0<br>3        | -              | -              | -              | -              |
| α-Phellandrene         | 99-83-2    | 0.2±0.02             | -              | -              | -              | -              |
| (-)-α-Pinene           | 80-56-8    | 3.1±0.25             | 0.19±0.0<br>8  | -              | -              | -              |
| Camphene               | 79-92-5    | 0.36±0.0<br>3        | 1.17±0.1<br>5  | -              | -              | -              |
| β-Phellandrene         | 555-10-2   | 4.23±0.3             | 0.66±0.0<br>6  | -              | -              | -              |
| β-Pinene               | 18172-67-3 | 1.22±0.0<br>7        | 0.16±0.0<br>7  | -              | -              | -              |
| Methylheptenone        | 110-93-0   | 0.27±0.0<br>2        | -              | -              | -              | -              |
| Myrcene                | 123-35-3   | 8.83±0.1<br>2        | 5.4±0.9        | -              | 0.43±0.0<br>7  | 0.18±0.0<br>4  |
| Leaf acetate           | 3681-71-8  | 1.3±0.17             | 8.6±0.64       | 4.51±0.7<br>4  | 5.67±0.8<br>4  | -              |
| 4-Carene               | 29050-33-7 | 1.67±0.2<br>2        | -              | -              | -              | -              |
| o-CyMene               | 527-84-4   | 1.56±0.1<br>5        | -              | -              | -              | -              |
| 1,8-Cineole            | 470-82-6   | 20.15±0.<br>15       | 2.00±1.0<br>0  | -              | -              | -              |
| Phenylacetaldehyde     | 122-78-1   | 0.24±0.0<br>7        | -              | -              | -              | -              |
| γ-Terpinene            | 99-85-4    | 0.45±0.0<br>79       | -              | -              | -              | 0.32±0.5<br>1  |
| Trans-sabinene hydrate | 17699-16-0 | 1.3±0.27             | -              | -              | -              | 0.45±0.0<br>2  |
| Terpinolene            | 586-62-9   | 0.38±0.1<br>5        | -              | -              | -              | 0.33±0.2<br>3  |
| D-Camphor              | 464-49-3   | 9.02±0.7<br>8        | 9.8±0.95       | -              | -              | -              |
| Terpinen-4-ol          | 562-74-3   | 0.32±0.1             | -              | -              | -              | -              |

|                                               |                |               |                |               |                |               |
|-----------------------------------------------|----------------|---------------|----------------|---------------|----------------|---------------|
| Methyl salicylate                             | 119-36-8       | 0.51±0.1<br>8 | -              | 0.68±0.1<br>1 | 0.06±0.0<br>2  | 0.07±0.0<br>3 |
| α-Terpineol                                   | 98-55-5        | 0.87±0.1<br>1 | -              | -             | -              | -             |
| Cis-3-Hexen-1-yl Valerate                     | 35852-46<br>-1 | 0.20±0.0<br>8 | -              | -             | -              | -             |
| 3-methyl-6-(1-methylethyl)-2-Cyclohexen-1-one | 89-81-6        | 1.74±0.1<br>7 | -              | -             | -              | -             |
| Terpinyl acetate                              | 80-26-2        | 7.30±0.5<br>3 | -              | -             | -              | -             |
| β-Caryophyllene                               | 87-44-5        | 9.06±0.1<br>9 | 15.15±0.<br>54 | 6.86±0.3<br>3 | 19.27±0.<br>66 | 9.34±0.3<br>3 |
| Himachalene                                   | 1461-03-<br>6  | 1.62±0.1<br>7 | -              | -             | -              | -             |
| α-Curcumene                                   | 644-30-4       | 1.34±0.1<br>2 | -              | -             | -              | -             |
| Cubebene                                      | 13744-15<br>-5 | 0.83±0.0<br>9 | 21.02±1.<br>42 | 0.18±0.0<br>8 | -              | -             |
| 7-Heptadecene                                 | 56554-78<br>-0 | 0.46±0.1<br>1 | -              | -             | -              | -             |
| Germacrene B                                  | 15423-57<br>-1 | 0.68±0.1<br>8 | -              | -             | 2.90±0.4<br>6  | -             |
| 1-Chlorooctadecane                            | 3386-33-<br>2  | 0.28±0.1<br>6 | -              | -             | -              | -             |
| 1-Octen-3-ol                                  | 3391-86-<br>4  | -             | 0.36±0.1<br>1  | -             | -              | -             |
| 3-Octanone                                    | 106-68-3       | -             | 0.35±0.0<br>9  | -             | -              | -             |
| (E)-β-Ocimene                                 | 3779-61-<br>1  | -             | 0.34±0.0<br>9  | 0.36±0.0<br>9 | 1.76±0.1<br>2  | 9.47±0.2      |
| Campholenic aldehyde                          | 4501-58-<br>0  | -             | 0.17±0.0<br>7  | -             | -              | -             |
| Myrtenol                                      | 515-00-4       | -             | 0.14±0.0<br>6  | -             | -              | -             |
| Cis-3-Hexen-1-yl Valerate                     | 35852-46<br>-1 | -             | 0.25±0.0<br>8  | -             | -              | -             |
| a-Gurjunene                                   | 489-40-7       | -             | 0.18±0.0<br>7  | -             | -              | -             |
| α-Humulene                                    | 6753-98-<br>6  | -             | 1.55±0.2<br>3  | -             | -              | 0.79±0.1<br>1 |
| Alloaro Madendrene                            | 25246-27<br>-9 | -             | 0.59±0.1<br>6  | -             | -              | -             |
| Gamma muurolene                               | 30021-74<br>-0 | -             | 1.21±0.1<br>4  | -             | 0.26±0.0<br>8  | 0.07±0.1      |
| (+)-Ledene                                    | 21747-46<br>-6 | -             | 2.67±0.2<br>1  | -             | -              | -             |
| Cyclohexane                                   | 3242-08-<br>8  | -             | 5.26±0.1<br>5  | -             | -              | -             |
| (+)-Cadinene                                  | 483-76-1       | -             | 1.64±0.1<br>1  | -             | -              | -             |
| b-Bisabolene                                  | 495-61-4       | -             | 0.19±0.0<br>6  | 0.43±0.1<br>2 | -              | -             |
| Hexyl acetate                                 | 142-92-7       | -             | 0.45±0.1<br>1  | 0.34±0.0<br>8 | 0.26±0.0<br>8  | -             |
| (Z)-3-Hexenal                                 | 6789-80-<br>6  | -             | -              | 2.95±0.2<br>3 | -              | -             |
| Sabinen                                       | 3387-41-<br>5  | -             | -              | 0.17±0.0<br>6 | -              | -             |
| Phenethyl alcohol                             | 60-12-8        | -             | -              | 0.14±0.0<br>7 | 0.07±0.0<br>1  | -             |
| Ethyl phenylacetate                           | 101-97-3       | -             | -              | 0.66±0.1<br>1 | -              | -             |

|                            |                |   |                |                |                |                |
|----------------------------|----------------|---|----------------|----------------|----------------|----------------|
| Acetic acid linalool ester | 115-95-7       | - | -              | 0.86±0.0<br>9  | -              | -              |
| (E)-β-Farnesene            | 28973-97<br>-9 | - | -              | 47.61±0.<br>20 | 16.89±0.<br>21 | -              |
| α-Cedrene                  | 469-61-4       | - | -              | 0.11±0.0<br>4  | -              | -              |
| Nerolidol                  | 7212-44-<br>4  | - | -              | 0.10±0.0<br>5  | -              | 0.23±0.1<br>1  |
| α-Bergamotene              | 17699-05<br>-7 | - | -              | 0.86±0.1<br>0  | -              | -              |
| α-Zingiberene              | 495-60--<br>3  | - | -              | 0.24±0.0<br>9  | -              | -              |
| α-Farnesene                | 502-61-4       | - | -              | 0.25±0.0<br>8  | 16.89±0.<br>1  | -              |
| a-Thujone                  | 546-80-5       | - | -              | -              | 0.07±0.0<br>3  | -              |
| Cis-3-hexenyl valerate     | 35852-46<br>-1 | - | -              | -              | 0.82±0.0<br>8  | -              |
| B-Bourbonene               | 5208-59-<br>3  | - | -              | -              | 0.05±0.0<br>1  | -              |
| β-Elemene                  | 515-13-9       | - | -              | -              | 2.73±0.2<br>5  | -              |
| γ-Cadinene                 | 39029-41<br>-9 | - | 24.71±0.<br>24 | -              | 13.97±0.<br>25 | 18.61±0.<br>28 |
| α-Humulene                 | 6753-98-<br>6  | - | -              | -              | 1.28±0.0<br>5  | -              |
| α-Patchoulene              | 560-32-7       | - | -              | -              | 0.10±0.0<br>3  | -              |
| Chrysanthenone             | 473-06-3       | - | -              | -              | -              | 0.27±0.0<br>7  |
| Iso-Geraniol               | 5944-20-<br>7  | - | -              | -              | -              | 0.09±0.0<br>2  |
| (-)-Isocaryophyllenel      | 118-65-0       | - | -              | -              | -              | 0.35±0.0<br>4  |
| β-selinene                 | 17066-67<br>-0 | - | -              | -              | -              | 0.83±0.1<br>2  |
| Calamenene                 | 483-77-2       | - | -              | -              | -              | 0.12±0.0<br>4  |

Note: '-' is not detected

OT—*Opisthopappus taihangensis*, CL—*Chrysanthemum lavandulifolium*, CN—*Chrysanthemum nankingense*, CV—*Chrysanthemum vestitum*, CI—*Chrysanthemum indicum*.

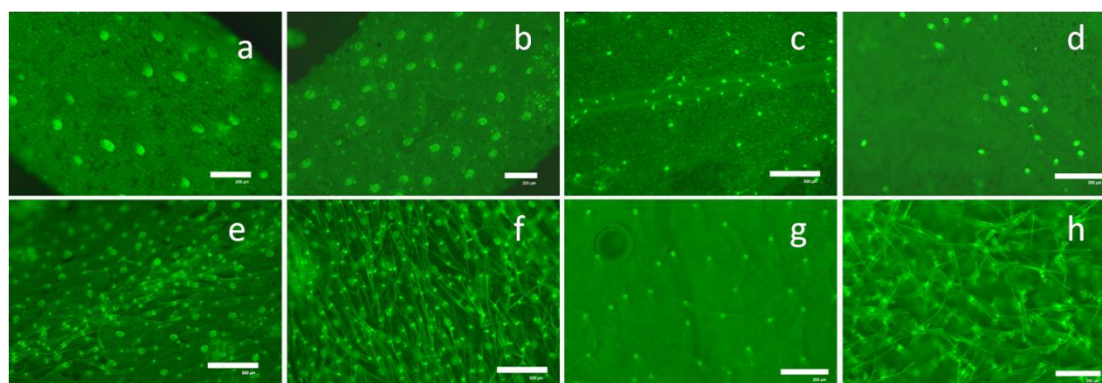

**Figure 1.** Fluorescence distribution of leaf trichomes of five wild species. a,b The distribution of trichomes of *O. taihangensis* on upper and lower surface. c,d The distribution of trichomes of *C. lavandulifolium* and *C. nankingense* on upper surface on upper and lower surface. e,f The distribution of trichomes of *C. vestitum* on upper and lower surface. g,h The distribution of trichomes of *C. indicum* on upper and lower surface.
